# Supplementary material
Source: Springer Nature journal article supplement (https://www.springermedizin.de/resource/supplementary/13075_2011_3578_MOESM4_ESM.pdf/9694844)

**A**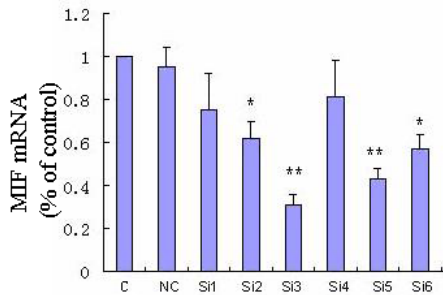**B** $\beta$ -actin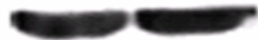

MIF

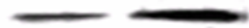

si194164

siControl

 $\beta$ -actin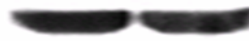I $\kappa$ B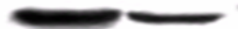

si194164

siControl

Supplement: MOESM4 [file 9694844]
